# Supplementary material for: Temporal Resolution of Input Weather Data Strongly Affects an Off-Grid PV System Layout and Reliability
Source: MDPI journal article supplement (doi:10.3390/solar3010004), 2023-01-06
Supplement: s1 [file s1]

1. Weather monitoring website. Available online: <https://www.ecowitt.net/home/index?id=47647> (accessed on 23 November 2022)  
Weather data with 30 min temporal resolution presented in files 30m\_23005\_ID.xlsx, 30m\_39352\_ID.xlsx, 30m\_47647\_ID.xlsx.  
Weather data with 5 min temporal resolution presented in files 5m\_23005\_ID.xlsx, 5m\_39352\_ID.xlsx, 5m\_47647\_ID.xlsx.
2. Battery energy storage manufacturer's website (SunStonePower. Available online: <https://www.sunstonepower.com/products.html> (accessed on 21 October 2022)

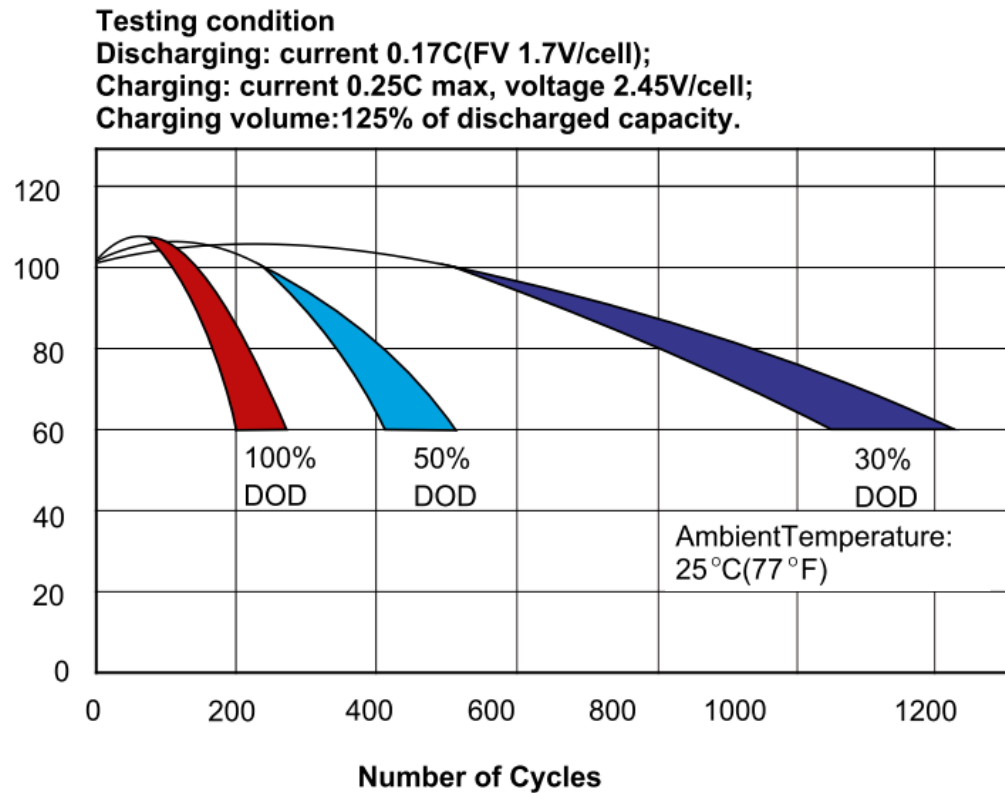

Figure S1. Cycle life in relation to depth of discharge. ML12-200.

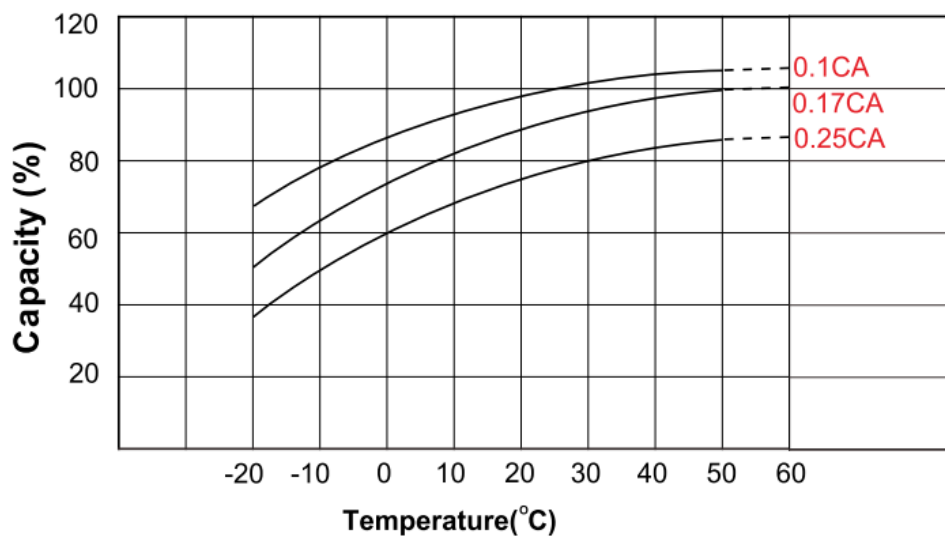

Figure S2. Temperature effects in relation to battery capacity. ML12-200.

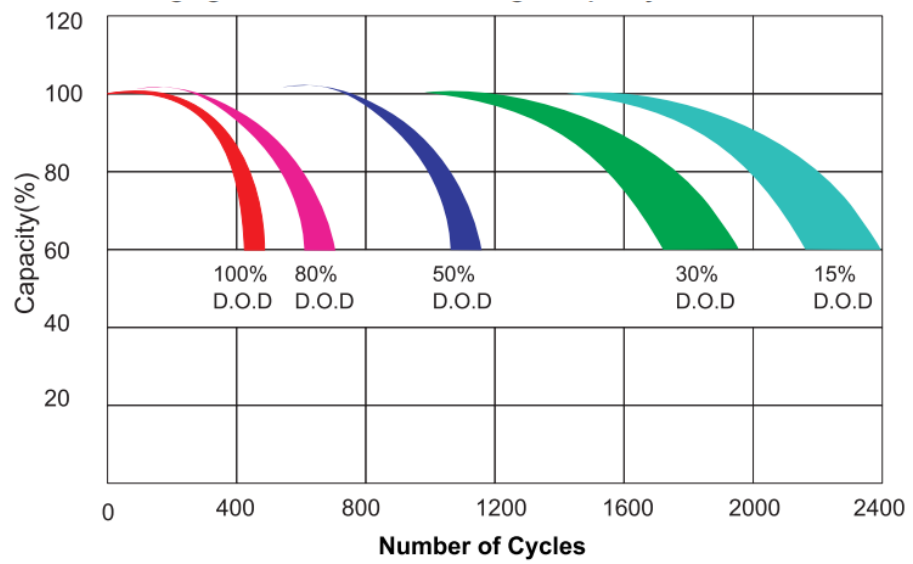

**Figure S3.** Cycle life in relation to depth of discharge. MLG12-200.

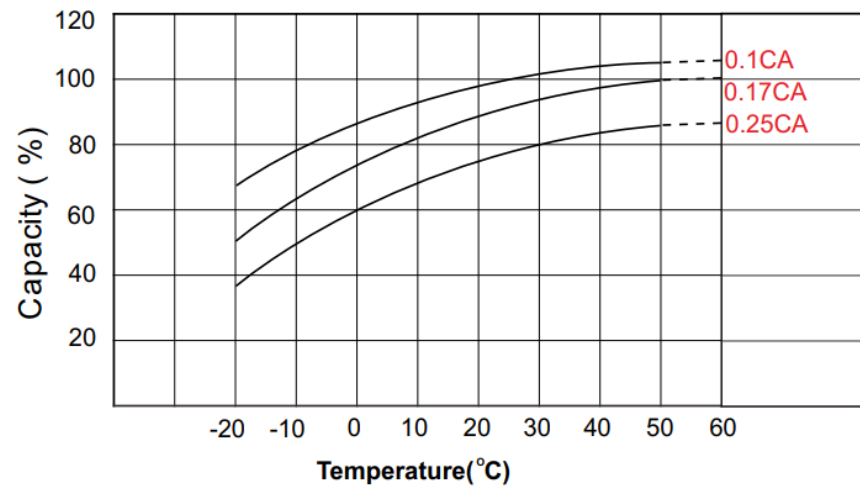

**Figure S4.** Temperature effects in relation to battery capacity. MLG12-200.
